# Supplementary material for: Pathway crosstalk perturbation network modeling for identification of connectivity changes induced by diabetic neuropathy and pioglitazone
Source: PubMed Central journal article supplement (PMC6322225; doi:10.1186/s12918-018-0674-7), 2019-01-07

# Disease to Treatment

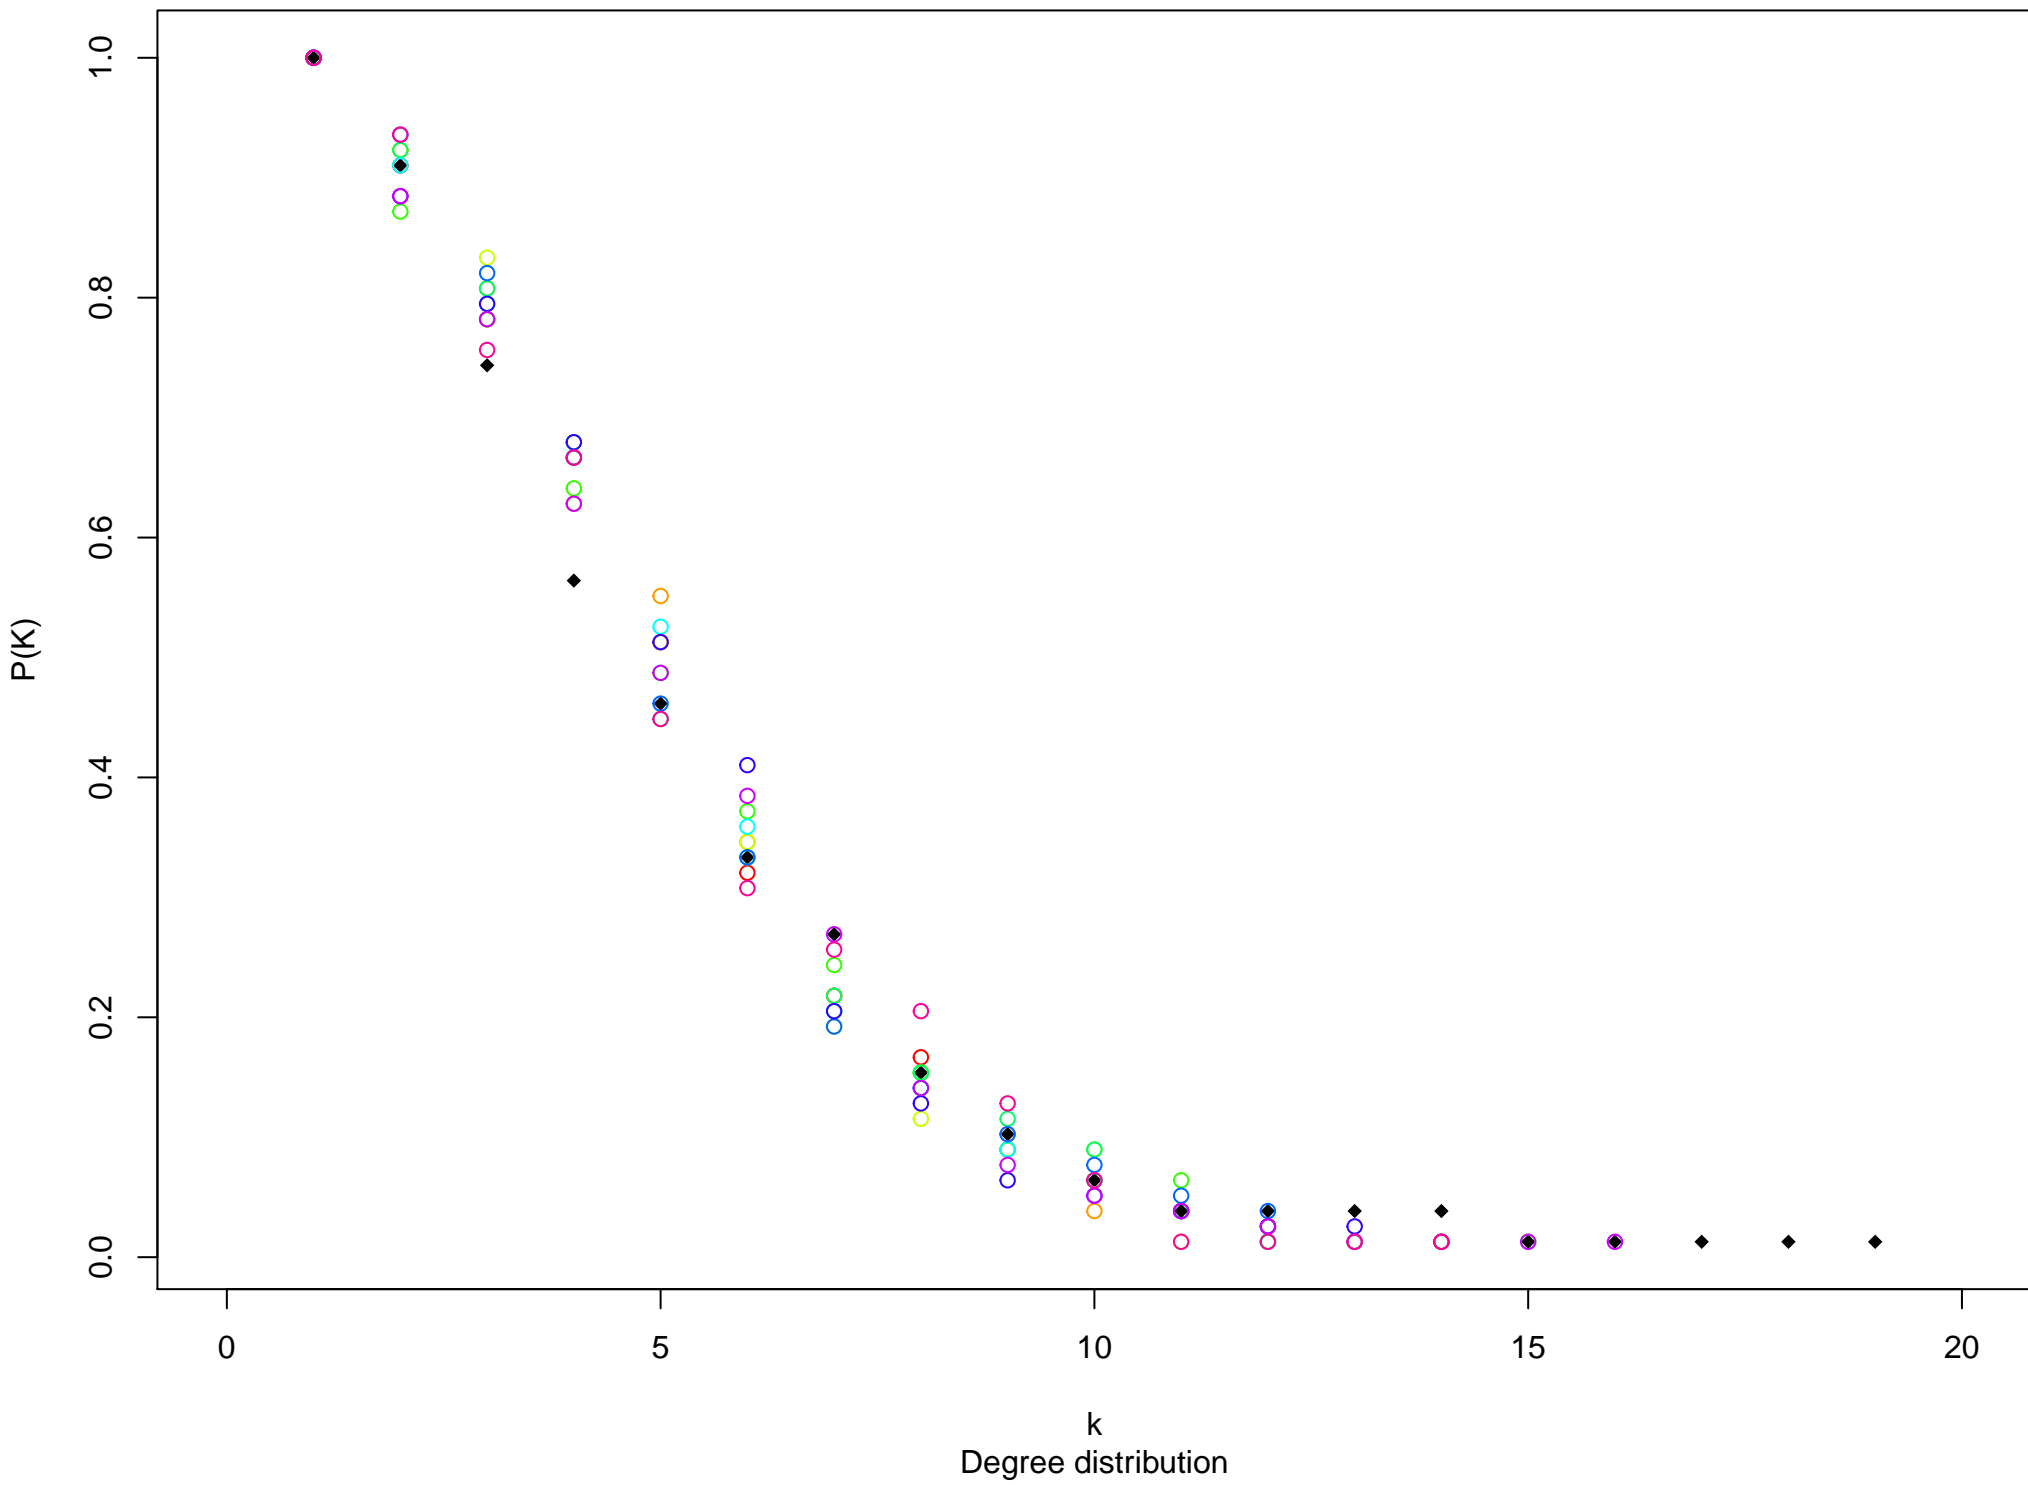

Supplement: 12918_2018_674_MOESM11_ESM.pdf [file 12918_2018_674_MOESM11_ESM.pdf]
