# Supplementary material for: Pathway crosstalk perturbation network modeling for identification of connectivity changes induced by diabetic neuropathy and pioglitazone
Source: BMC Syst Biol. 2019 Jan 7;13:1. doi: 10.1186/s12918-018-0674-7 (PMC6322225; doi:10.1186/s12918-018-0674-7)
Supplement: Supplementary file 13 — Parameters of the random networks generated with the null model in XLSX format. (XLSX 21 kb) [file 12918_2018_674_MOESM13_ESM.xlsx]

## Sheet: Sheet1
Parameter value	Health to Disease	Disease to Treatment	Treatment to Health
Nodes	104	78	110
Edges	222	149	213
Clustering coefficient (average 5000 networks)	0.149	0.171	0.126
Average shortest path (average 5000 networks)	3.27	3.26	3.46
Connected components (average 5000 networks)	10.73	8.66	10.93
Single nodes (average 5000 networks)	9.08	7.09	9.24
|Z-score| > 20
|Z-score| > 10
|Z-score| > 2
Z-scores	Health to Disease	Disease to Treatment	Treatment to Health
Nodes	104	78	110
Edges	222	149	213
Clustering coefficient (average 5000 networks)	22.36	18.4	21.95
Average shortest path (average 5000 networks)	4.43	-11.03	2.35
Connected components (average 5000 networks)	4.96	4.1	3.5
Single nodes (average 5000 networks)	2.16	-0.04	0.77

## Sheet: Sheet2
Parameter value
Nodes (average 198 networks, nodes > 0)	6.9
Nodes (average 110 networks, edges > 0)	11.6
Edges (average 110 networks, edges > 0)	209.6
Clustering coefficient (average 110 networks, edges > 0)	0.97
Average shortest path (average 110 networks, edges > 0)	1
Connected components (average 110 networks, edges > 0)	1.7
